# Supplementary material for: Direct and self-selective synthesis of Ag nanowires on patterned graphene
Source: Royal Society of Chemistry journal article supplement (doi:10.1039/c6ra28389f), 2017-01-01
Supplement: c6ra28389f1.pdf [file c6ra28389f1.pdf]

## Supporting Information for

### Direct and Self-selective Synthesis of Ag Nanowires on Patterned Graphene

*Tran Nam Trung, Dong-Ok Kim, and Eui-Tae Kim\**

Department of Materials Science & Engineering, Chungnam National University, Daejeon  
305-764, Korea

\*Corresponding Author. E-mail: etkim@cnu.ac.kr

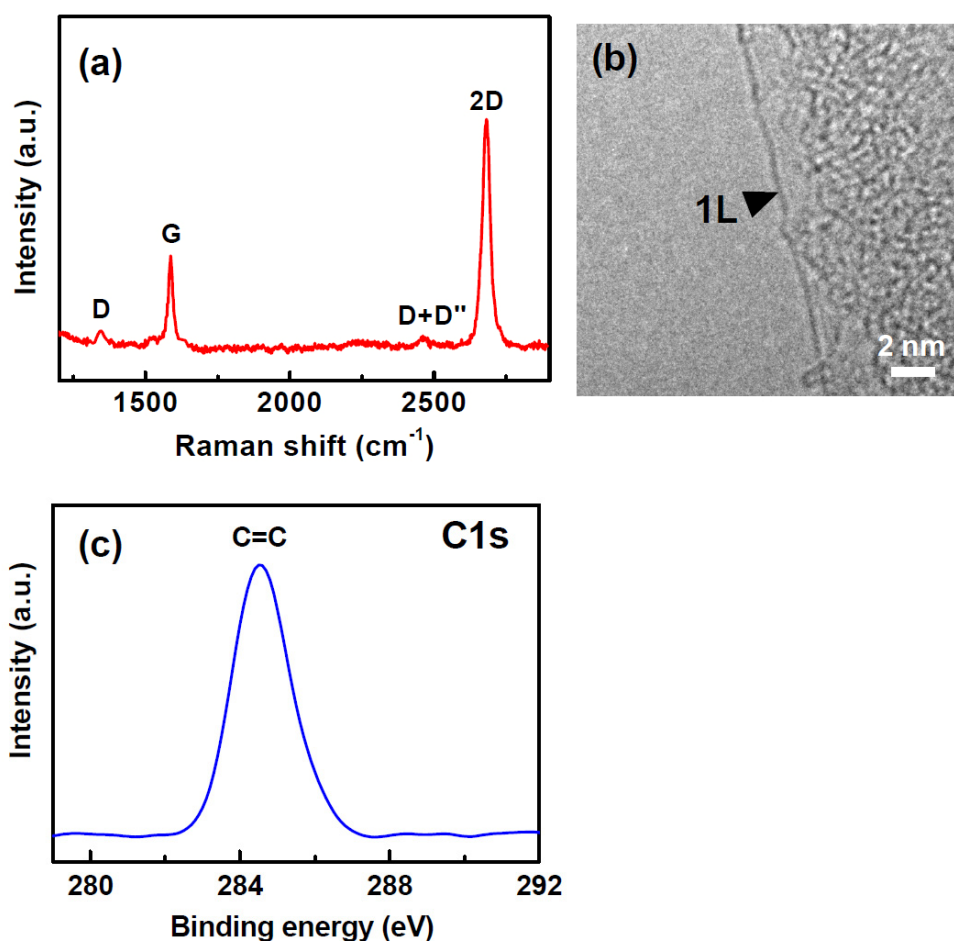

**Figure S1.** Characteristics of pristine graphene: (a) Raman spectrum, (b) HRTEM image, and (c) XPS spectrum of C 1s core level.

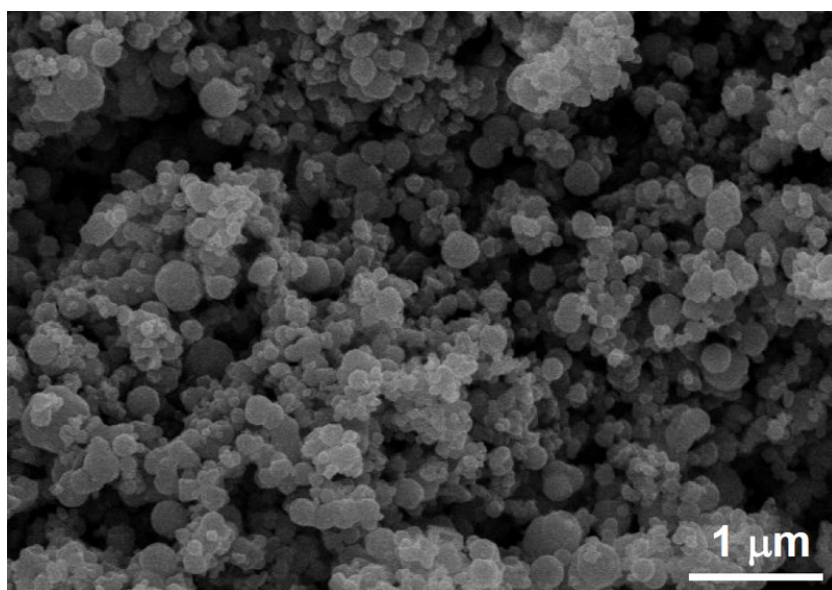

**Figure S2.** SEM image of Ag sediments collected in solution after 30 min reaction with 60 mM AgNO<sub>3</sub>.

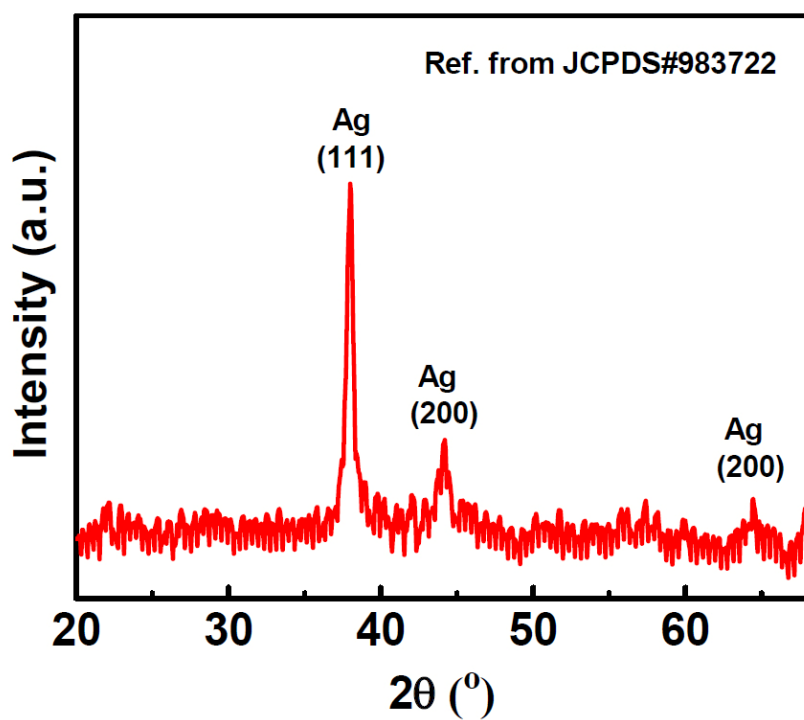

**Figure S3.** XRD pattern of annealed Ag NWs.

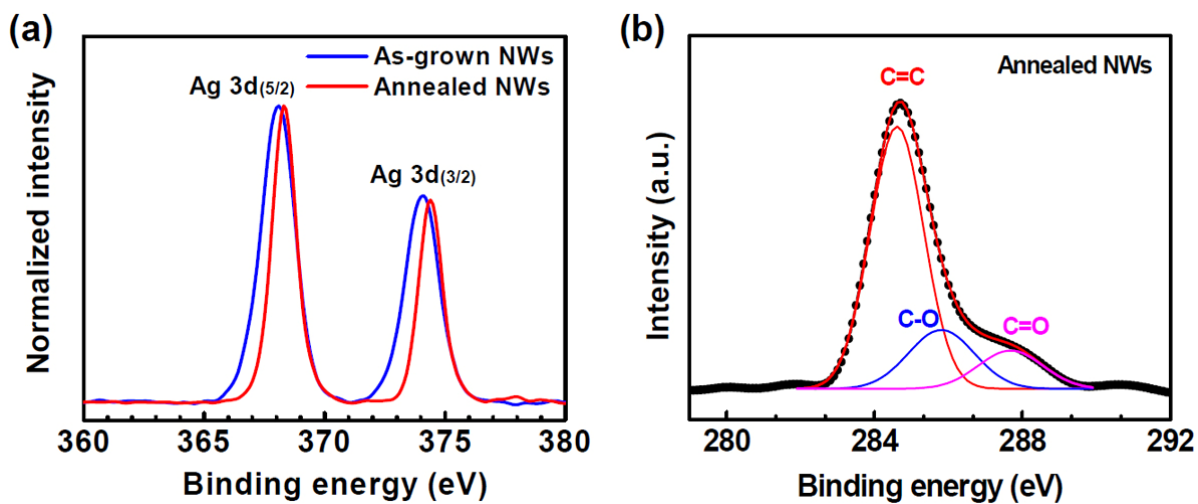

**Figure S4.** XPS spectra of annealed Ag NWs: (a) Ag 3d and (b) C 1s core levels.

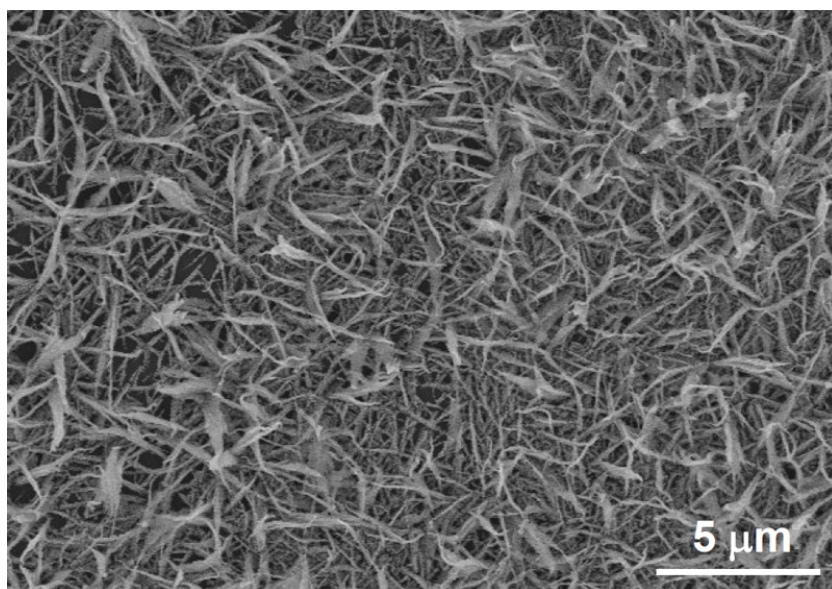

**Figure S5.** SEM image of Ag NWs synthesized on graphene with 60 mM AgNO<sub>3</sub> for 30 min.

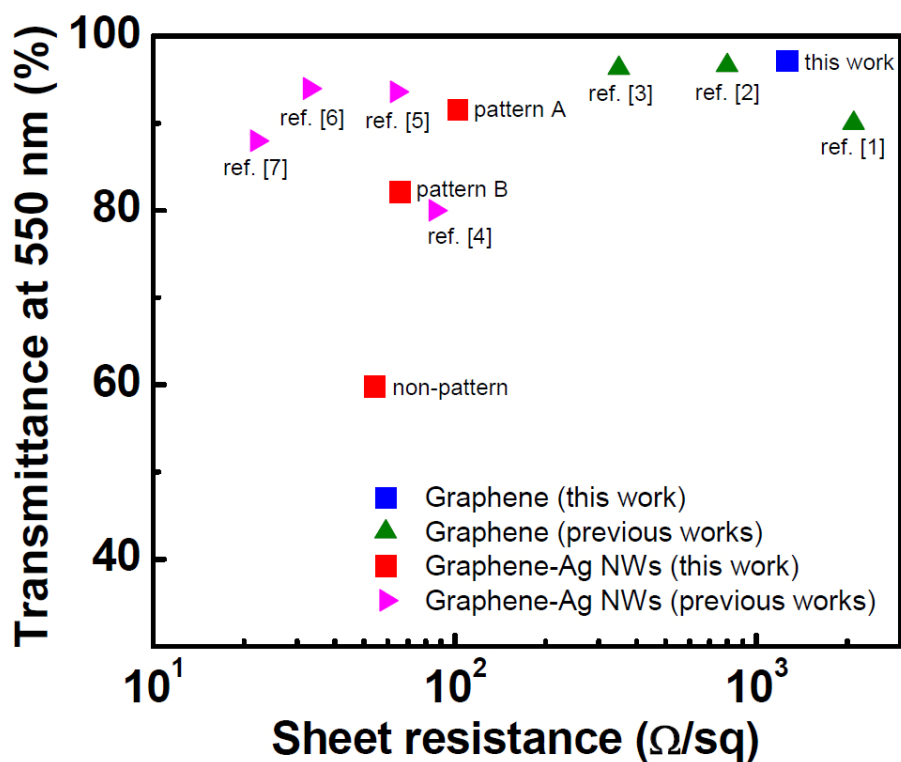

**Figure S6.** Sheet resistance and light transmittance at 550 nm of graphene and graphene-Ag NW hybrid films: comparison this work with previous studies (Refs. 1-7).

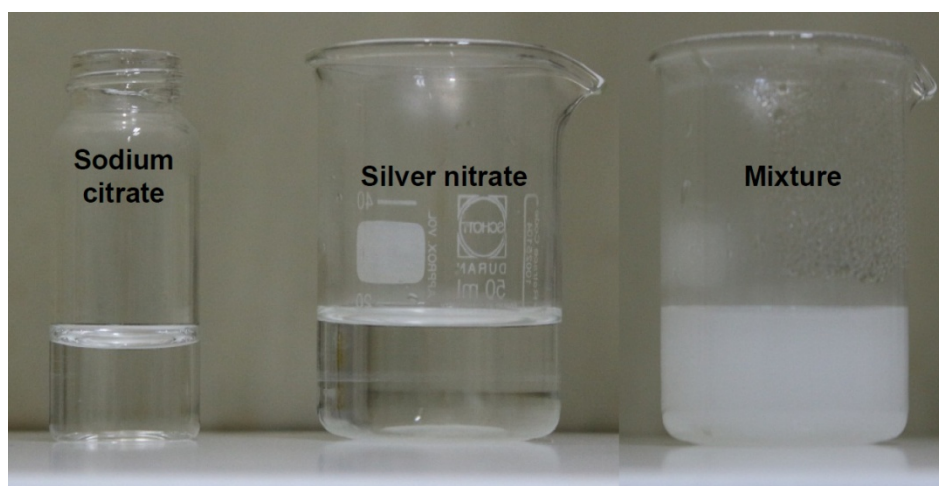

**Figure S7.** Photographs of sodium citrate and  $\text{AgNO}_3$  solutions, and the mixture of sodium citrate and  $\text{AgNO}_3$  solutions.

## References

- 1 L. Gao, W. Ren, J. Zhao, L.-P. Ma, Z. Chen and H.-M. Cheng, *Applied Physics Letters*, 2010, **97**, 183109.
- 2 C. J. An, S. J. Kim, H. O. Choi, D. W. Kim, S. W. Jang, M. L. Jin, J.-M. Park, J. K. Choi and H.-T. Jung, *Journal of Materials Chemistry A*, 2014, **2**, 20474-20480.
- 3 X. Li, Y. Zhu, W. Cai, M. Borysiak, B. Han, D. Chen, R. D. Piner, L. Colombo and R. S. Ruoff, *Nano Letters*, 2009, **9**, 4359-4363.
- 4 H.-W. Tien, S.-T. Hsiao, W.-H. Liao, Y.-H. Yu, F.-C. Lin, Y.-S. Wang, S.-M. Li and C.-C. M. Ma, *Carbon*, 2013, **58**, 198-207.
- 5 I. N. Kholmanov, C. W. Magnuson, A. E. Aliev, H. Li, B. Zhang, J. W. Suk, L. L. Zhang, E. Peng, S. H. Mousavi, A. B. Khanikaev, R. Piner, G. Shvets and R. S. Ruoff, *Nano Letters*, 2012, **12**, 5679-5683.
- 6 M.-S. Lee, K. Lee, S.-Y. Kim, H. Lee, J. Park, K.-H. Choi, H.-K. Kim, D.-G. Kim, D.-Y. Lee, S. Nam and J.-U. Park, *Nano Letters*, 2013, **13**, 2814-2821.
- 7 R. Chen, S. R. Das, C. Jeong, M. R. Khan, D. B. Janes and M. A. Alam, *Advanced Functional Materials*, 2013, **23**, 5150-5158.
